# Supplementary material for: Analysis of genome-wide knockout mouse database identifies candidate ciliopathy genes
Source: PubMed Central journal article supplement (PMC9715561; doi:10.1038/s41598-022-19710-7), 2022-12-01
Supplement: 41598_2022_19710_MOESM1_ESM.pdf [file 41598_2022_19710_MOESM1_ESM.pdf]

## INTERNATIONAL MOUSE PHENOTYPING CONSORTIUM MEMBERS

David Adams<sup>14</sup>, Arthur L. Beaudet<sup>12</sup>, Fatima Bosch<sup>27</sup>, Bob Braun<sup>15</sup>, Steve Brown<sup>11</sup>, Hsian-Jean Genie Chin<sup>31</sup>, Mary Dickinson<sup>12</sup>, Michael Dobbie<sup>28</sup>, Paul Flicek<sup>23</sup>, Sanjeev Galande<sup>29</sup>, Xiang Gao<sup>21</sup>, Anne Grobler<sup>30</sup>, Jason D. Heaney<sup>12</sup>, Yann Hérault<sup>16,17,18,19,20</sup>, Martin Hrabe<sup>13</sup>, Natasha Karp<sup>14</sup>, Ann-Marie Mallon<sup>11</sup>, Fabio Mammano<sup>26</sup>, Terrence Meehan<sup>23</sup>, Yuichi Obata<sup>22</sup>, Helen Parkinson<sup>23</sup>, Chuan Qin<sup>32</sup>, Radislav Sedlacek<sup>33</sup>, Toshihiko Shiroishi<sup>22</sup>, JK Seong<sup>25</sup>, Damian Smedley<sup>24</sup>, Glauco Tocchini-Valentini<sup>26</sup>, Sara Wells<sup>11</sup>, Ying Xu<sup>34</sup>.

<sup>11</sup> Medical Research Council Harwell Institute (Mammalian Genetics Unit and Mary Lyon Centre), Harwell, Oxfordshire OX11 0RD, UK.

<sup>12</sup> Department of Molecular and Human Genetics, Baylor College of Medicine, Houston, TX 77030, USA.

<sup>13</sup> German Mouse Clinic, Institute of Experimental Genetics, Helmholtz Zentrum München, German Research Center for Environmental Health, Ingolstädter Landstraße 1, 85764 Neuherberg, Germany.

<sup>14</sup> The Wellcome Trust Sanger Institute, Wellcome Genome Campus, Hinxton, Cambridge CB10 1SA, UK.

<sup>15</sup> The Jackson Laboratory, Bar Harbor, ME 04609, USA.

<sup>16</sup> Institut de Génétique et de Biologie Moléculaire et Cellulaire, Université de Strasbourg, 1 rue Laurent Fries, 67404 Illkirch, France.

<sup>17</sup> Centre National de la Recherche Scientifique, UMR7104 Illkirch, France.

<sup>18</sup> Institut National de la Santé et de la Recherche Médicale, U1258 Illkirch, France.

<sup>19</sup> Université de Strasbourg, 1 rue Laurent Fries, 67404 Illkirch, France.

<sup>20</sup> CELPHEDIA, PHENOMIN, Institut Clinique de la Souris (ICS), CNRS, INSERM, Université of Strasbourg, 1 rue Laurent Fries, 67404 Illkirch-Graffenstaden, France.

<sup>21</sup> SKL of Pharmaceutical Biotechnology and Model Animal Research Center, Collaborative Innovation Center for Genetics and Development, Nanjing Biomedical Research Institute, Nanjing University, Nanjing 210061, China.

<sup>22</sup> RIKEN BioResource Center, Tsukuba, Ibaraki 305-0074, Japan.

<sup>23</sup> European Molecular Biology Laboratory, European Bioinformatics Institute, Wellcome Genome Campus, Hinxton, Cambridge CB10 1SD, UK.

<sup>24</sup> Clinical Pharmacology, Charterhouse Square, Barts and the London School of Medicine and Dentistry, Queen Mary University of London, London EC1M 6BQ, UK.

<sup>25</sup> Korea Mouse Phenotyping Consortium (KMPC) and BK21 Program for Veterinary Science, Research Institute for Veterinary Science, College of Veterinary Medicine, Seoul National University, 599 Gwanangno, Gwanak-gu, Seoul 08826, South Korea.

<sup>26</sup> Monterotondo Mouse Clinic, Italian National Research Council (CNR), Institute of Cell Biology and Neurobiology, Adriano Buzzati-Traverso Campus, Via Ramarini, I-00015 Monterotondo Scalo, Italy.

<sup>27</sup> Universitat Autònoma de Barcelona, Barcelona, Spain.

<sup>28</sup> Phenomics Australia, The Australian National University, 131 Garran Rd, Acton ACT 2601, Australia.

<sup>29</sup> Indian Institutes of Science and Education Research, Dr Homi Bhabha Rd, Ward No. 8, NCL Colony, Pashan, Pune, Maharashtra 411008, India

<sup>30</sup> PCDDP North-West University North-West University Potchefstroom Campus 11 Hoffman Street Potchefstroom 2531

<sup>31</sup> National Laboratory Animal Center, National Applied Research Laboratories 3F., No. 106, Sec. 2, Heping E. Rd., Da'an Dist., Taipei City 106214, Taiwan (R.O.C.)

<sup>32</sup> Institute of Laboratory Animal Sciences, Chinese Academy of Medical Science 5 Panjiayuan Nanli, Chaoyang District, Beijing, 100021, China

<sup>33</sup> Czech centre for phenogenomics, IMG BIOCEV building SO.02 Prumyslova 595 252 50 Vestec, Czech Republic, Europe.

<sup>34</sup>CAM-SU Genomic Research Center, Soochow University, Organization Planning of No. 1 Shizi Street, Suzhou, China.

### **IMPC Full List of Members**

Cheryl Ackert-Bicknell, David J Adams, Douglas Adams, Anne-Tounsia Adoum, Juan A Aguilar-Pimentel, Dalila Ali-Hadji, Oana V Amarie, Philippe André, Aurelie Auburtin, Chaouki Bam'Hamed, Johannes Beckers, Joachim Beig, Alexandr Bezginov, Marie-Christine Birling, Katharina Boroviak, Joanna Bottomley, Lynette Bower, Mohammed Bubshait, Antje Bürger, Dirk H Busch, Natalie C Butterfield, Jorge Cabezas, Pilar Cacheiro, Julia Calzada-Wack, Emma L Cambridge, Marie-France Champy, Tracy Carroll, Heather Cater, Philippe Charles, Elissa J Chesler, Yi-Li Cho, Valentina Cipriani, Greg Clark, Shannon Clarke, Nicola Cockle, Gemma Codner, Amie Creighton, Maribelle Cruz, Katharine F Curry, Abigail D'Souza, Ozge Danisment, Daniel Delbarre, Hannah F Dewhurst, Brendan Doe, Alex Dorr, Florian Giesert, Graham Duddy, Kyle Duffin, Amal El Amri, Hillary Elrick, Patricia Feugas, Martin Fray, Anthony Frost, Helmut Fuchs, Valerie Gailus-Durner, Karen K Gampe, Milan Ganguly, David Gannon, Lillian Garrett, Marina Gertsenstein, Diane Gleeson, Leslie Goodwin, Jochen Graw, Kristin Grimsrud, Ruolin Guo, Hamed Haselimashhadi, Jason D Heaney, Liane Hobson, Andreas Hörlein, Deborah Hogg, Sabine M Hölter, Seung-Hyun Hong, Neil Horner, Ziyue Huang, Jane Hunter, Joanna Joeng, Coleen Kane, Lois Kelsey, Janet Kenyon, Ruairidh King, Piia Keskiivali-Bond, Andrea Kirton, Tanja Klein-Rodewald, Thomas Klopstock, Davide Komla-Ebri, Tomasz Konopka, Ralf Kühn, Fiona Kussy, David Lafont, Qing Lan, Denise G Lanza, Valerie Laurin, Elise Le Marchand, Sophie Leblanc, Victoria D Leitch, Christoph Lengger, Lauri Lintott, John G Logan, Isabel Lorenzo, Suzanne MacMaster, Ann-Marie Mallon, Naila S Mannan, Susan Marschall, Matthew Mckay, Robbie SB McLaren-Jones, Jeremy Mason, Terrence F Meehan, David Miller, Michayla Moore, Lily Morikawa, Violeta Munoz-Fuentes, Stephen A Murray, Dong Nguyen-Bresinsky, Celeste Owen, Oskar Oritz, Panos Pandis, Helen Parkinson, Alexandru Parlog, Amit Patel, Guillaume Pavlovic, Patricia Penton, Monica Pereira, Kevin Peterson, Vivek Philip, Andrea S Pollard, Jan Prochazka, Dawei Qu, Sean Rangarajan,

Birgit Rathkolb, Mike Relac, Kyle Robertson, Willson Roper, Stéphane Rousseau, David W Rowe, Jan Rozman, Jennifer Ryan, Edward J Ryder, Luis Santos, Adrián Sanz-Moreno, Joel Schick, Zachary Seavey, John R Seavitt, Claudia Seisenberger, Mohammed Selloum, Xueyuan Shang, Dong-Guk Shin, Michelle Simon, Gillian Sleep, Damian Smedley, Tania Sorg, Penny C Sparkes, Nadine Spielmann, Ralph Steinkamp, Michelle Stewart, Claudia Stoeger, Ewan Straiton, Karen L Svenson, Holly Swash, Lydia Teboul, Sandra Tondat, Irina Treise, Catherine Tudor, Rachel Urban, Valerie E Vancollie, Laurent Vasseur, Igor Vukobradovic, Hannah Wardle-Jones, Jonathan Warren, Marie Wattenhofer-Donze, Sara E Wells, Henrik Westerberg, Jacqueline K White, Jean-Paul Wiegand, Amelia Willett, Catherine Witmeyer, Eckhard Wolf, Joshua Wood, Wolfgang Wurst, Catherine Xu, Yingchun Zhu, and Annemarie Zimprich.
